# Supplementary material for: Assessing the Virologic Impact of Archived Resistance in the Dolutegravir/Lamivudine 2-Drug Regimen HIV-1 Switch Study TANGO through Week 144
Source: MDPI journal article supplement (doi:10.3390/v15061350), 2023-06-11
Supplement: s1 [file s1]

**Table S1.** Baseline Characteristics of Participants With or Without Archived M184V/I in the Proviral Resistance Analysis Population (PRAP<sup>a</sup>)

| Baseline characteristics                                      | DTG/3TC<br>(N=320)   |                      | TAF-based regimen<br>(N=318) |                      |
|---------------------------------------------------------------|----------------------|----------------------|------------------------------|----------------------|
|                                                               | M184V/I<br>(N=4)     | Wild-type<br>(N=316) | M184V/I<br>(N=3)             | Wild-type<br>(N=315) |
| Age, median (range), y                                        | 40.5 (31-61)         | 40.5 (20-74)         | 43.0 (28-52)                 | 40.0 (18-73)         |
| Sex, male, n (%)                                              | 4 (100)              | 295 (93)             | 3 (100)                      | 290 (92)             |
| Race, White, n (%)                                            | 4 (100)              | 253 (80)             | 2 (67)                       | 242 (77)             |
| HIV-1 subtype, B, n (%)                                       | 4 (100)              | 277 (88)             | 2 (67)                       | 273 (87)             |
| Region, USA                                                   | 4 (100)              | 128 (41)             | 1 (33)                       | 135 (43)             |
| Baseline third agent class,<br>INSTI, n (%)                   | 3 (75)               | 249 (79)             | 3 (100)                      | 250 (79)             |
| Baseline CD4+ count, median<br>(range), cells/mm <sup>3</sup> | 750.0<br>(508-1062)  | 677.5<br>(133-1671)  | 575.0<br>(416-1075)          | 725<br>(119-1810)    |
| Duration of ART before Day<br>1, median (range), mo           | 72.5<br>(50.2-158.3) | 34.4<br>(7.3-201.2)  | 27.7<br>(9.3-30.3)           | 36.4<br>(7.0-147.4)  |

ART, antiretroviral therapy; DTG, dolutegravir; INSTI, integrase strand transfer inhibitor; RAM, resistance-associated mutation; TAF tenofovir alafenamide; 3TC, lamivudine.

<sup>a</sup>PRAP is described in the Methods.
